# Supplementary material
Source: PubMed Central journal article supplement (PMC3135951)
Supplement: supp_pp.110.167809_167809draft_supp.pdf [file supp_pp.110.167809_167809draft_supp.pdf]

# Supplemental Material

## Protocol S1

The PromPredict algorithm considers the average free energy over a 100nt window and compares it with the the average free energy over a downstream 100nt window separated by 50bp. Hence, to predict whether a nucleotide ‘n+50’ is a promoter, the following parameters are determined and E1(n+50) and D(n+50) are compared with their corresponding cutoffs from Table S1.

$$E1(n + 50) = \frac{\sum_n^{n+100} \Delta G^0}{100} \quad (1)$$

$$E2(n + 50) = \frac{\sum_{n+150}^{n+250} \Delta G^0}{100} \quad (2)$$

$$D(n + 50) = E1(n + 50) - E2(n + 50) \quad (3)$$

All such predicted consecutive nucleotides are grouped to form the same prediction if they lie within 50bp of each other. The procedure of arriving at cut-off values and prediction method is described in detail by Rangannan and Bansal (2009).

Table S1: *Cutoff values for E1 and D*: The cutoff values are applied according to the GC content of surrounding 1000nt fragment. The cutoffs have been derived by training on transcription start site (TSS) and translation start site (TLS) data of prokaryotes (Rangannan and Bansal, 2010) and match well with the AFE values obtained for upstream promoter and downstream non-promoter regions in Arabidopsis and rice, as shown in Fig. S3.

| GC% Range | E1-cutoff | D-cutoff | GC% Range | E1-cutoff | D-cutoff |
|-----------|-----------|----------|-----------|-----------|----------|
| 15 – 20   | -14.5     | 1.0      | 50 – 55   | -19.2     | 1.4      |
| 20 – 25   | -15.1     | 1.0      | 55 – 60   | -20.0     | 1.4      |
| 25 – 30   | -15.6     | 1.0      | 60 – 65   | -21.0     | 1.2      |
| 30 – 35   | -16.3     | 1.0      | 65 – 70   | -22.0     | 1.2      |
| 35 – 40   | -16.8     | 1.2      | 70 – 75   | -23.0     | 1.2      |
| 40 – 45   | -17.3     | 1.4      | 75 – 80   | -24.0     | 1.2      |
| 45 – 50   | -18.3     | 1.4      | 80 – 85   | -25.0     | 1.2      |

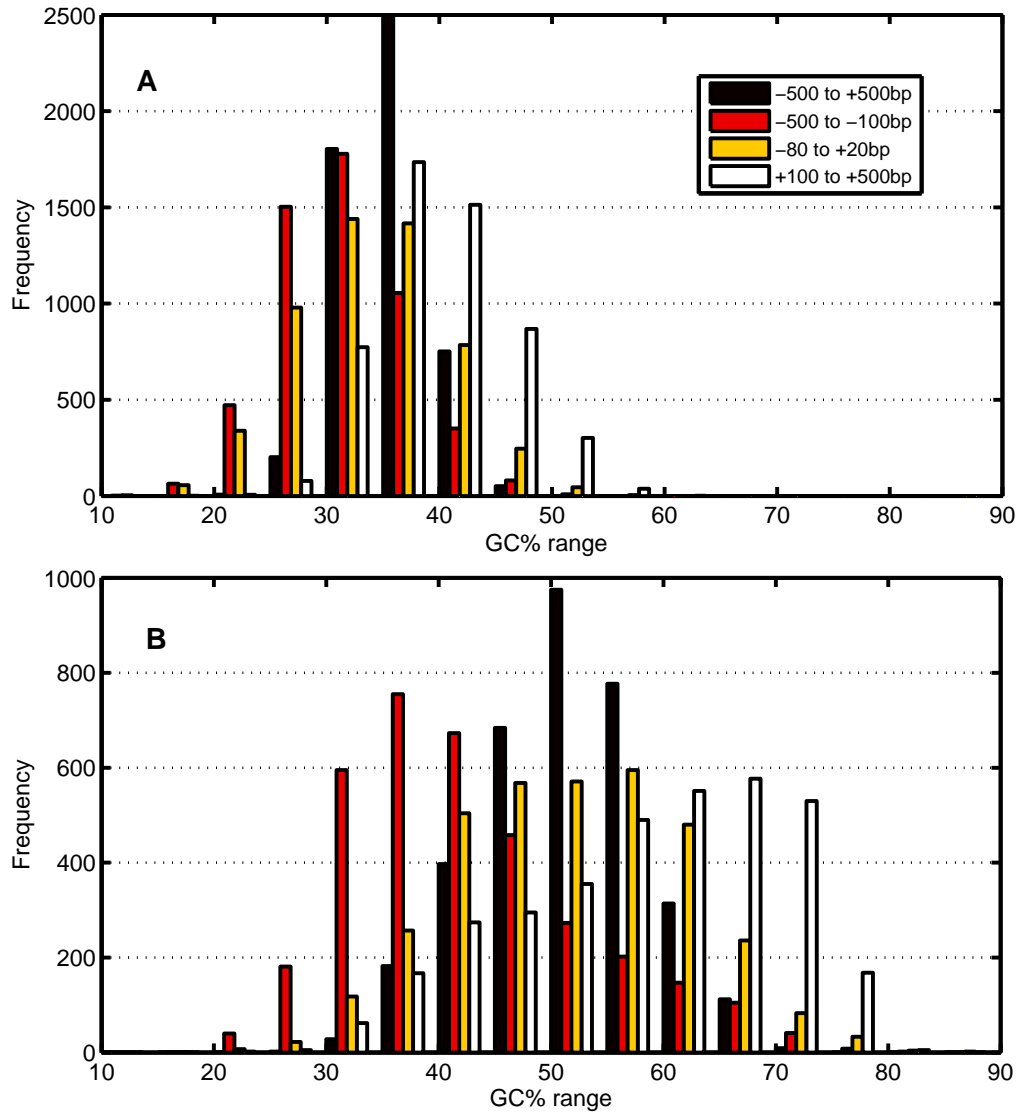

Figure S1: GC content distribution for (A) *Arabidopsis* and (B) *rice* sequences in the vicinity of transcription start site (TSS): The frequency distribution of GC content in a 1000bp segment (-500bp to +500bp) around TSS, upstream sequence (-500bp to -100bp), downstream sequence (+100bp to +500bp) and sequence adjacent to the TSS (-80bp to +20bp) are shown. The GC content of *Arabidopsis* promoters shows a narrow range within each subclass and small differences between the subclasses. The GC content for the *rice* promoters shows a broad range with large differences between subclasses especially upstream and downstream regions.

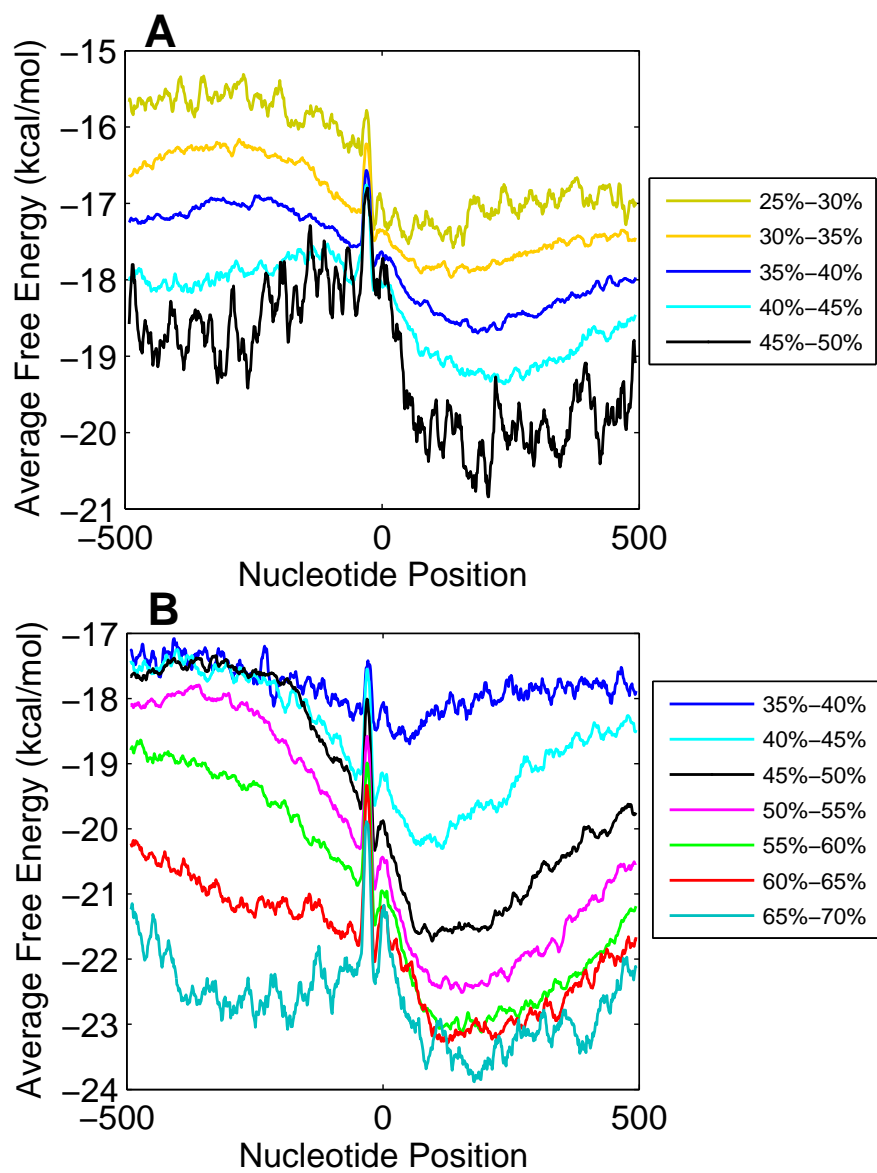

Figure S2: AFE profiles for 1000bp sequences (–500 to +500bp with respect to TSS) in different ranges of GC content are shown for genes from chr.1 of (A) Arabidopsis and (B) rice.

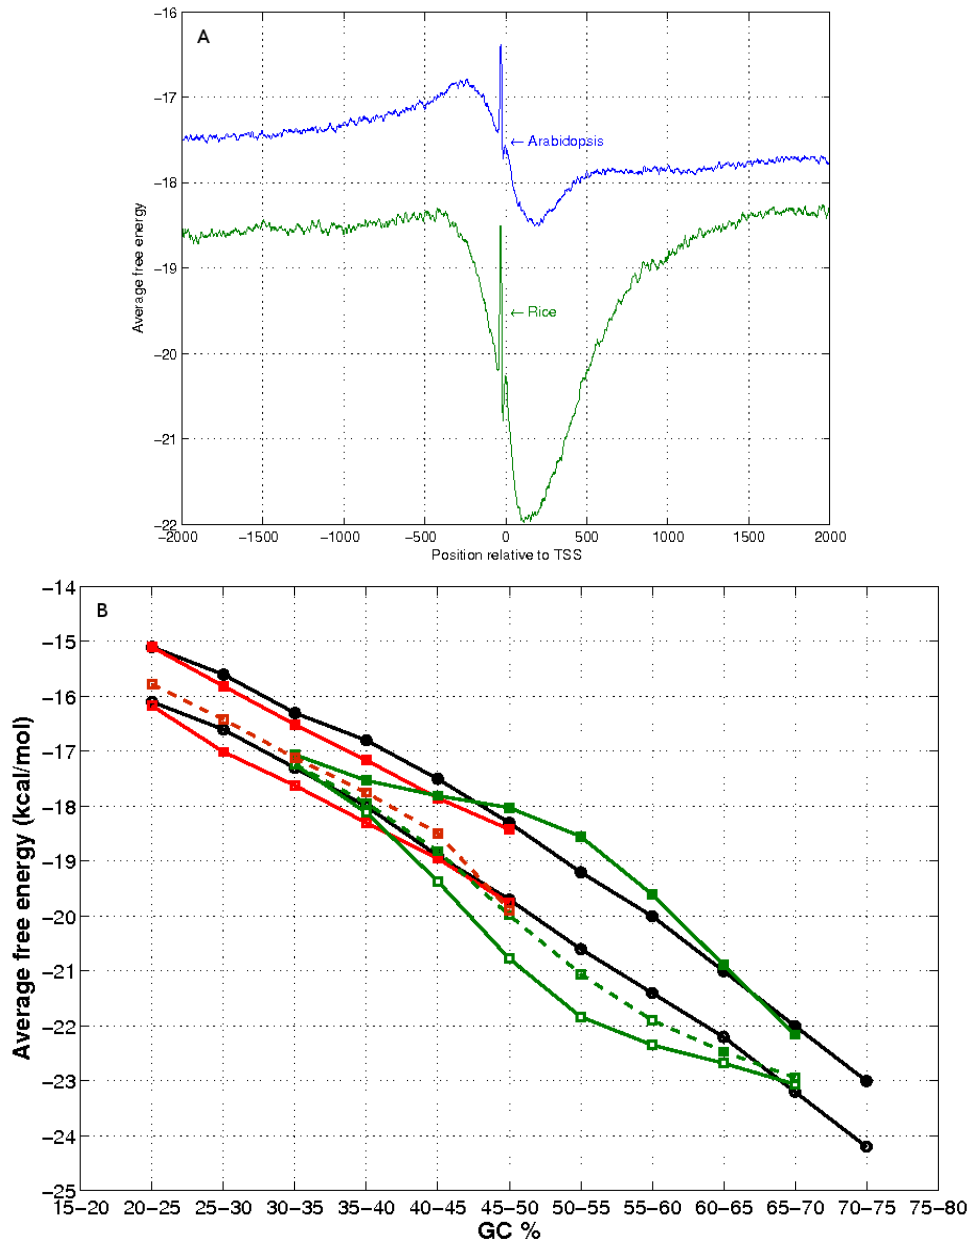

Figure S3: (A) AFE profiles in the region  $-2000\text{bp}$  to  $+2000\text{bp}$  in the vicinity of the TSS for chr1 Arabidopsis and rice. (B) The threshold values of free energy used to predict promoters in genomic DNA with GC content varying between 20 to 80% as derived from prokaryotic genomic data are shown in black. The filled circles correspond to the minimal free energy threshold (E1) for a particular fragment and hollow circles to the free energy (E2) in its downstream region, for it to be assigned as a putative promoter. The average free energy values in a representative set of 1001 nt long sequences flanking the TSSs in Arabidopsis and rice are shown as red and green squares respectively. The AFE values for the  $+500$  to  $+1000$  downstream regions in Arabidopsis and rice are shown as hollow squares connected by a dashed lines.

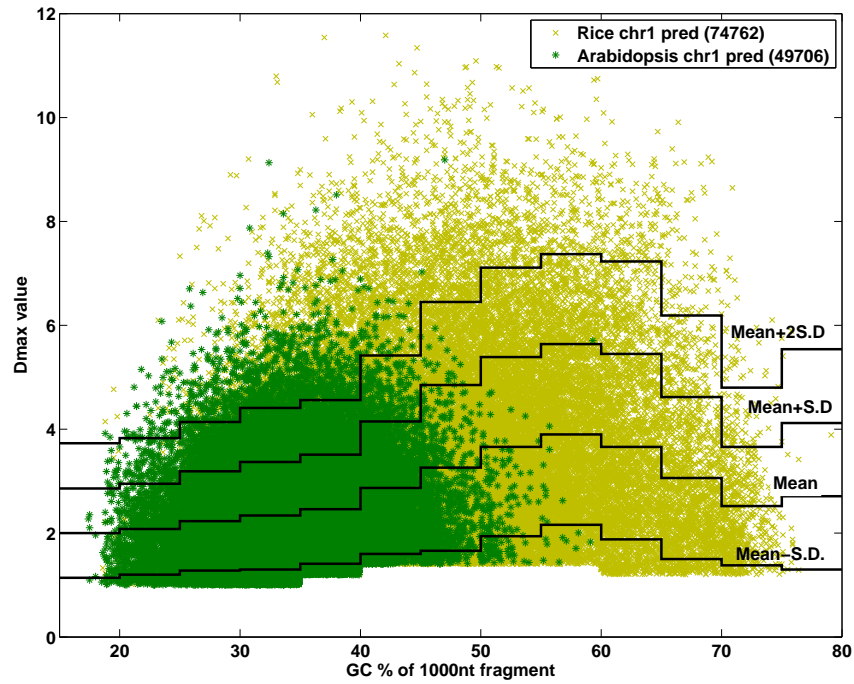

Figure S4: Cutoffs values for score classes were determined from the mean and standard deviation of Dmax values from Arabidopsis and rice predictions.

Table S2: Cutoff values based on mean and standard deviation of maximum D value of Arabidopsis and rice predictions

| GC% Range | No. of seq <sup>a</sup> | Dmax cutoff |      |           |              |
|-----------|-------------------------|-------------|------|-----------|--------------|
|           |                         | Mean-S.D.   | Mean | Mean+S.D. | Mean + 2S.D. |
| 15-20     | 113                     | 1.14        | 2.00 | 2.86      | 3.73         |
| 20-25     | 1789                    | 1.20        | 2.08 | 2.95      | 3.83         |
| 25-30     | 9405                    | 1.28        | 2.23 | 3.19      | 4.14         |
| 30-35     | 26073                   | 1.30        | 2.34 | 3.37      | 4.41         |
| 35-40     | 37942                   | 1.41        | 2.46 | 3.51      | 4.56         |
| 40-45     | 20018                   | 1.60        | 2.87 | 4.15      | 5.42         |
| 45-50     | 11709                   | 1.66        | 3.26 | 4.85      | 6.45         |
| 50-55     | 7195                    | 1.94        | 3.66 | 5.39      | 7.11         |
| 55-60     | 4725                    | 2.16        | 3.90 | 5.64      | 7.37         |
| 60-65     | 2903                    | 1.88        | 3.66 | 5.45      | 7.23         |
| 65-70     | 1836                    | 1.50        | 3.06 | 4.62      | 6.19         |
| 70-75     | 726                     | 1.38        | 2.52 | 3.66      | 4.80         |
| 75-80     | 24                      | 1.30        | 2.71 | 4.12      | 5.54         |

<sup>a</sup>: Sequences pooled from both rice and Arabidopsis predictions

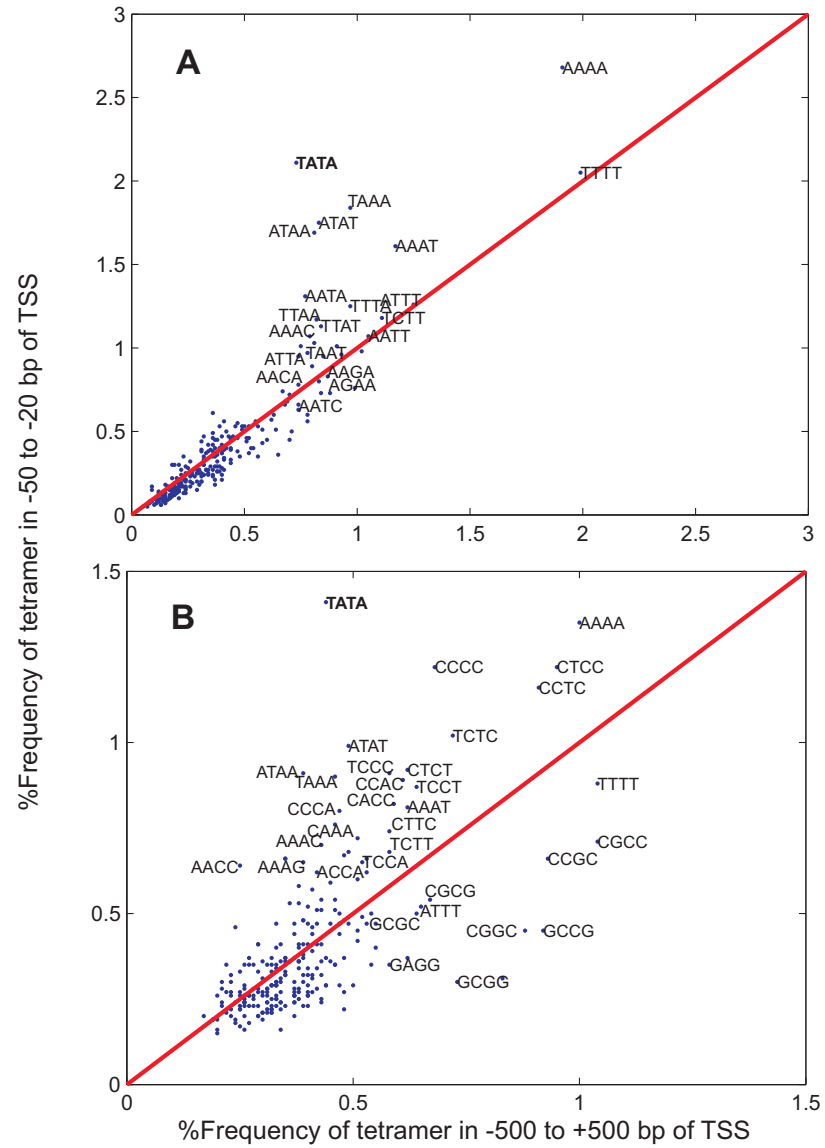

Figure S5: Percentage frequency of occurrence of tetramers in core promoter (–50 to –20 bp) as compared to that in the 1000nt (–500 to +500 bp) region in the vicinity of TSS for (A) Arabidopsis and (B) rice.

## Protocol S2

Gene Ontology: The genes categorized in the Gene Ontology GO SLIM categories were downloaded from TAIR (<http://www.arabidopsis.org>) for Arabidopsis and AmiGO (The Gene Ontology Consortium, 2000; Carbon et al., 2009) for rice. The percentage of genes that have TP predictions in region  $-500$  to  $+100$ bp with respect to the TSS ( $TP_{genes}$ ) and that don't have any predictions in this region ( $FP_{genes}$ ) were determined.

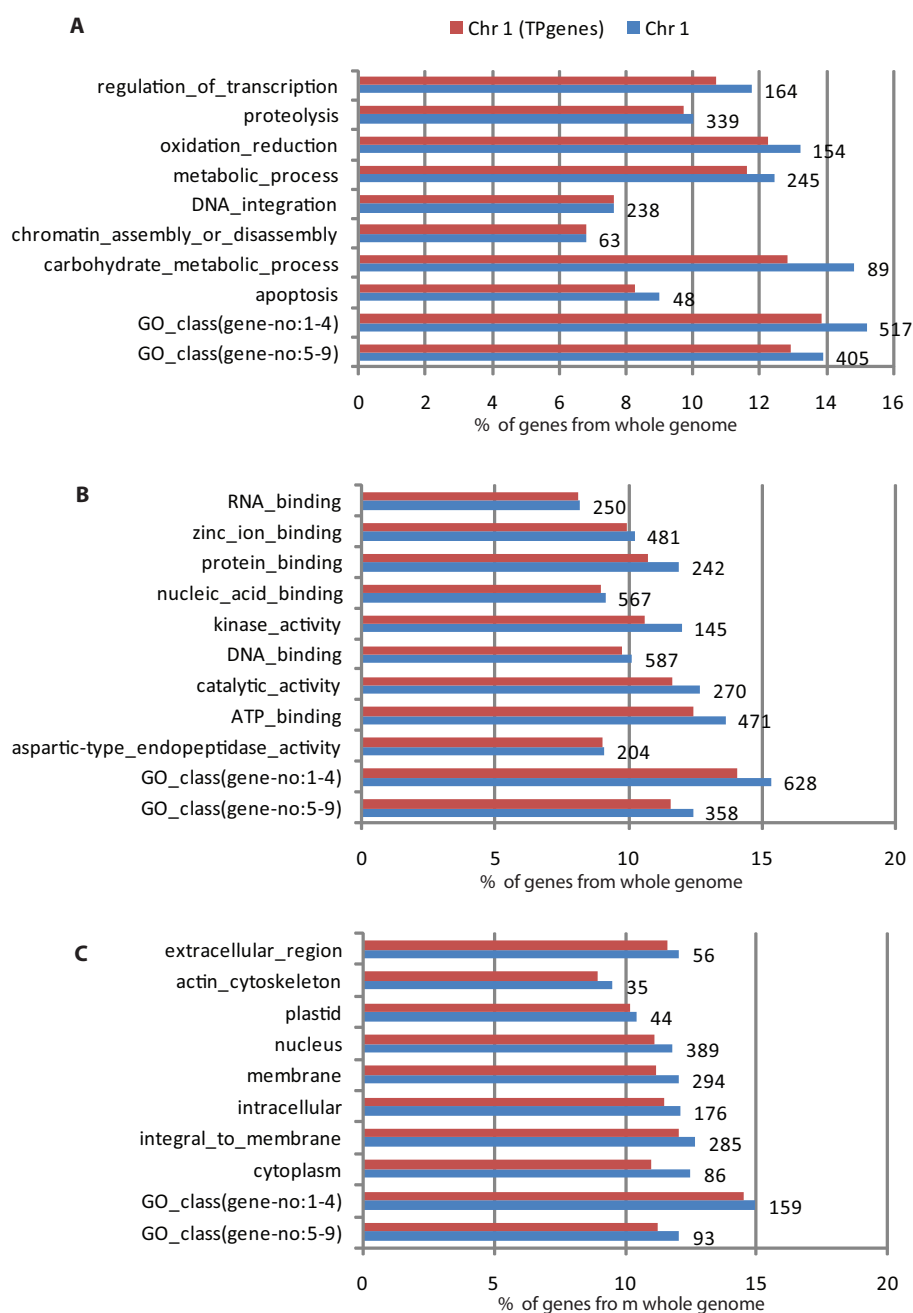

Figure S6: Gene representation in GO categories for (A) Biological Process, (B) Molecular Function and (C) Cellular Component. The figure shows genes from rice chr 1 for each GO category as a percentage of the genes in the whole genome present in that category. The red bar indicates the TP genes while the blue bar indicates all genes. The number of chr 1 genes assigned to each category are mentioned adjacent to each bar.

Table S3: Distribution of Arabidopsis TP and FN genes in GO categories as a percentage of the total genes in the genome present in that category.

| Functional Category                    | Total genes | TP: % of Total | FN: % of Total |
|----------------------------------------|-------------|----------------|----------------|
| <b>Cellular Component</b>              |             |                |                |
| extracellular                          | 359         | 95.265         | 4.178          |
| cell wall                              | 485         | 94.639         | 5.361          |
| other cellular components              | 2406        | 93.724         | 6.359          |
| plasma membrane                        | 1827        | 93.596         | 6.568          |
| nucleus                                | 2079        | 93.362         | 6.590          |
| plastid                                | 969         | 92.570         | 7.946          |
| other membranes                        | 2528        | 92.366         | 7.872          |
| Golgi apparatus                        | 207         | 92.271         | 9.179          |
| chloroplast                            | 2635        | 91.879         | 8.008          |
| ER                                     | 348         | 91.667         | 7.759          |
| other cytoplasmic components           | 2696        | 91.320         | 8.828          |
| other intracellular components         | 3415        | 91.274         | 8.726          |
| cytosol                                | 664         | 91.114         | 9.337          |
| unknown cellular components            | 5050        | 91.030         | 8.772          |
| mitochondria                           | 881         | 90.919         | 9.535          |
| ribosome                               | 388         | 86.856         | 13.402         |
| <b>Molecular Function</b>              |             |                |                |
| transcription factor activity          | 1188        | 94.737         | 5.343          |
| nucleic acid binding                   | 615         | 94.181         | 5.360          |
| other enzyme activity                  | 2481        | 93.764         | 6.652          |
| other binding                          | 2579        | 93.748         | 6.361          |
| hydrolase activity                     | 1700        | 93.253         | 6.802          |
| transporter activity                   | 864         | 93.204         | 6.580          |
| other molecular functions              | 998         | 93.010         | 6.710          |
| transferase activity                   | 1775        | 92.641         | 8.038          |
| nucleotide binding                     | 1443        | 92.322         | 7.550          |
| DNA or RNA binding                     | 1428        | 92.248         | 8.075          |
| kinase activity                        | 877         | 92.122         | 8.298          |
| protein binding                        | 1787        | 91.735         | 8.419          |
| receptor binding or activity           | 118         | 91.473         | 6.977          |
| unknown molecular functions            | 5108        | 91.443         | 8.342          |
| structural molecule activity           | 387         | 87.755         | 12.245         |
| <b>Biological Process</b>              |             |                |                |
| transcription                          | 1231        | 94.801         | 5.280          |
| signal transduction                    | 771         | 94.034         | 6.096          |
| other biological processes             | 1396        | 93.625         | 6.734          |
| response to stress                     | 1529        | 93.525         | 6.867          |
| response to abiotic or biotic stimulus | 1487        | 93.208         | 7.061          |
| developmental processes                | 1386        | 92.857         | 7.937          |
| other metabolic processes              | 6503        | 92.773         | 7.335          |
| other cellular processes               | 6949        | 92.488         | 7.541          |
| protein metabolism                     | 2378        | 92.010         | 7.906          |
| transport                              | 1364        | 91.862         | 7.478          |
| cell organization and biogenesis       | 976         | 91.496         | 7.992          |
| unknown biological processes           | 6499        | 91.429         | 8.340          |
| electron transport or energy pathways  | 220         | 91.364         | 9.545          |
| DNA or RNA metabolism                  | 271         | 90.775         | 8.487          |

Table S4: Geneids for orthologous genes selected for comparison

| <b>Gene</b>                       | <b>Arabidopsis geneids</b> | <b>Rice geneids</b> |
|-----------------------------------|----------------------------|---------------------|
| <b>Aspartate aminotransferase</b> | At2g30970                  | Os02g0236000        |
| <b>Cu/Zn superoxide dismutase</b> | At5g18100                  | Os03g0219200        |
| <b>Dof genes</b>                  | At3g52400                  | Os03g0787000        |
| <b>P-type ATPase</b>              | At1g07670                  | Os03g0281600        |
| <b>FAD2</b>                       | At3g12120                  | Os02g0716500        |
| <b>PRF1</b>                       | At2g19760                  | Os10g0323600        |

## References

- Carbon, S., Ireland, A., Mungall, C. J., Shu, S., Marshall, B., Lewis, S., the AmiGO Hub, and the Web Presence Working Group (2009). AmiGO: online access to ontology and annotation data. *Bioinformatics*, 25:288–9.
- Rangannan, V. and Bansal, M. (2009). Relative stability of DNA as a generic criterion for promoter prediction: whole genome annotation of microbial genomes with varying nucleotide base composition. *Mol. Biosyst.*, 5:1758–69.
- Rangannan, V. and Bansal, M. (2010). High quality annotation of promoter regions for 913 bacterial genomes. *Bioinformatics*, 26:3043–50.
- The Gene Ontology Consortium (2000). Gene ontology: tool for the unification of biology. *Nat. Genet.*, 25:25–9.
